# Supplementary material for: Association of multiple genetic variants with breast cancer susceptibility in the Han Chinese population
Source: PubMed Central journal article supplement (PMC5356751; doi:10.18632/oncotarget.13402), 2016-11-16
Supplement: oncotarget-07-85483-s001.pdf [file oncotarget-07-85483-s001.pdf]

## Association of multiple genetic variants with breast cancer susceptibility in the Han Chinese population

### SUPPLEMENTARY TABLES

Supplementary Table S1: The MAF of all SNP, stratified by ER and PR status

| SNP        | Allele<br>A/B | ER+ (MAF) |         | ER- (MAF) |         | PR+(MAF) |         | PR-(MAF) |         |
|------------|---------------|-----------|---------|-----------|---------|----------|---------|----------|---------|
|            |               | Case      | Control | Case      | Control | Case     | Control | Case     | Control |
| rs4849887  | T/C           | 0.199     | 0.180   | 0.184     | 0.180   | 0.194    | 0.180   | 0.194    | 0.180   |
| rs6762644  | G/A           | 0.096     | 0.091   | 0.077     | 0.091   | 0.085    | 0.091   | 0.097    | 0.091   |
| rs4973768  | T/C           | 0.233     | 0.227   | 0.298     | 0.227   | 0.239    | 0.227   | 0.272    | 0.227   |
| rs981782   | G/T           | 0.360     | 0.320   | 0.309     | 0.320   | 0.360    | 0.320   | 0.317    | 0.320   |
| rs16886165 | G/T           | 0.331     | 0.326   | 0.316     | 0.326   | 0.321    | 0.326   | 0.335    | 0.326   |
| rs889312   | A/C           | 0.490     | 0.497   | 0.504     | 0.497   | 0.500    | 0.497   | 0.483    | 0.497   |
| rs1432679  | T/C           | 0.336     | 0.365   | 0.298     | 0.365   | 0.348    | 0.365   | 0.292    | 0.365   |
| rs2180341  | G/A           | 0.267     | 0.259   | 0.233     | 0.259   | 0.255    | 0.259   | 0.491    | 0.424   |
| rs10759243 | A/C           | 0.495     | 0.424   | 0.462     | 0.424   | 0.479    | 0.424   | 0.314    | 0.284   |
| rs10822013 | T/C           | 0.454     | 0.447   | 0.515     | 0.447   | 0.460    | 0.447   | 0.178    | 0.172   |
| rs704010   | A/G           | 0.341     | 0.284   | 0.301     | 0.284   | 0.338    | 0.284   | 0.269    | 0.240   |
| rs10771399 | G/A           | 0.180     | 0.172   | 0.169     | 0.172   | 0.174    | 0.172   | 0.194    | 0.180   |
| rs17356907 | G/A           | 0.219     | 0.240   | 0.254     | 0.240   | 0.200    | 0.240   | 0.097    | 0.091   |

A/B: Minor/major alleles on the control sample; MAF:Minor Allele Frequency.

**Supplementary Table S2: Associations of All SNP with breast cancer risk, stratified by ER and PR status (adjusted by Age+BMI)**

See Supplementary File 1

Supplementary Table S3: The MAF of all SNP, stratified by Clinic stage

| SNP        | Alleles<br>A/B | I and II combined (MAF) |         | III and IV combined (MAF) |         |
|------------|----------------|-------------------------|---------|---------------------------|---------|
|            |                | Case                    | Control | Case                      | Control |
| rs4849887  | T/C            | 0.195                   | 0.180   | 0.196                     | 0.180   |
| rs6762644  | G/A            | 0.088                   | 0.091   | 0.105                     | 0.091   |
| rs4973768  | T/C            | 0.248                   | 0.227   | 0.245                     | 0.227   |
| rs981782   | G/T            | 0.346                   | 0.320   | 0.365                     | 0.320   |
| rs16886165 | G/T            | 0.306                   | 0.326   | 0.324                     | 0.326   |
| rs889312   | A/C            | 0.510                   | 0.497   | 0.493                     | 0.497   |
| rs1432679  | T/C            | 0.316                   | 0.365   | 0.348                     | 0.365   |
| rs2180341  | G/A            | 0.260                   | 0.259   | 0.253                     | 0.259   |
| rs10759243 | A/C            | 0.485                   | 0.424   | 0.473                     | 0.424   |
| rs10822013 | T/C            | 0.477                   | 0.447   | 0.486                     | 0.447   |
| rs704010   | A/G            | 0.329                   | 0.284   | 0.318                     | 0.284   |
| rs10771399 | G/A            | 0.181                   | 0.172   | 0.179                     | 0.172   |
| rs17356907 | G/A            | 0.224                   | 0.240   | 0.233                     | 0.240   |

A/B: Minor/major alleles on the control sample; MAF:Minor Allele Frequency.

**Supplementary Table S4: Associations of All SNP with breast cancer risk, stratified by Clinic stage (adjusted by Age + BMI)**

| SNP        | Alleles | I and II combined  |                | III and IV combined |                |
|------------|---------|--------------------|----------------|---------------------|----------------|
|            |         | OR(95% CI)         | <i>p</i> value | OR(95% CI)          | <i>p</i> value |
| rs4849887  | T/C     | 1.106(0.870-1.405) | 0.412          | 1.109(0.803-1.533)  | 0.529          |
| rs6762644  | G/A     | 0.961(0.691-1.336) | 0.811          | 1.170(0.767-1.784)  | 0.466          |
| rs4973768  | T/C     | 1.120(0.899-1.396) | 0.312          | 1.103(0.818-1.487)  | 0.522          |
| rs981782   | G/T     | 1.126(0.923-1.374) | 0.242          | 1.221(0.935-1.595)  | 0.141          |
| rs16886165 | G/T     | 0.914(0.746-1.119) | 0.382          | 0.993(0.756-1.304)  | 0.959          |
| rs889312   | A/C     | 1.052(0.872-1.269) | 0.598          | 0.983(0.762-1.269)  | 0.898          |
| rs1432679  | T/C     | 0.803(0.658-0.980) | 0.031*         | 0.927(0.710-1.211)  | 0.578          |
| rs2180341  | G/A     | 1.006(0.811-1.248) | 0.958          | 0.971(0.723-1.303)  | 0.842          |
| rs10759243 | A/C     | 1.284(1.061-1.552) | 0.010*         | 1.220(0.943-1.578)  | 0.130          |
| rs10822013 | T/C     | 1.129(0.935-1.363) | 0.206          | 1.173(0.908-1.514)  | 0.221          |
| rs704010   | A/G     | 1.237(1.010-1.515) | 0.040*         | 1.174(0.891-1.547)  | 0.254          |
| rs10771399 | G/A     | 1.061(0.830-1.357) | 0.635          | 1.047(0.750-1.462)  | 0.787          |
| rs17356907 | G/A     | 0.914(0.731-1.143) | 0.430          | 0.962(0.712-1.300)  | 0.800          |

\**p* value  $\leq$  0.05 indicates statistical significance.

**Supplementary Table S5: Logistic regression analysis of the association between the SNPs and ER+ breast cancer risk (adjusted by Age + BMI)**

See Supplementary File 1

**Supplementary Table S6: Logistic regression analysis of the association between the SNPs and ER-breast cancer risk (adjusted by Age + BMI)**

See Supplementary File 1

**Supplementary Table S7: Logistic regression analysis of the association between the SNPs and PR+ breast cancer risk (adjusted by Age + BMI)**

See Supplementary File 1

**Supplementary Table S8: Logistic regression analysis of the association between the SNPs and PR- breast cancer risk (adjusted by Age + BMI)**

See Supplementary File 1



**Supplementary Table S9: Logistic regression analysis of the association between the SNPs and Clinic stage (UICC) I and II breast cancer risk (adjusted by Age + BMI)**

See Supplementary File 1

**Supplementary Table S10: Logistic regression analysis of the association between the SNPs and Clinic stage (UICC) III and IV breast cancer risk (adjusted by Age + BMI)**

See Supplementary File 1
